# Supplementary material for: Delocalization and bandgap engineering in defective MoS 2 by metal ion doping for enhanced electrical performance and efficient near-infrared detection
Source: Royal Society of Chemistry journal article supplement (doi:10.1039/d5tc04033g), 2025-12-29
Supplement: d5tc04033g1.pdf [file d5tc04033g1.pdf]

## Supplementary Information

# Delocalization and bandgap engineering in defective MoS<sub>2</sub> by metal-ion doping for enhanced electrical performance and efficient near-infrared detection

Minho Yoon,<sup>a†\*</sup> Heung-Sik Kim,<sup>b†\*</sup> Jiyoul Lee,<sup>cd</sup> Yong Uk Lee<sup>d\*</sup>

<sup>a</sup>Department of Physics and Institute of Quantum Convergence Technology, Kangwon National University, Chuncheon, 24341, Republic of Korea

<sup>b</sup>Department of Energy Engineering, Korea Institute of Energy Technology, Naju-si 58217, Republic of Korea

<sup>c</sup>Department of Smart Green Technology Engineering, Pukyong National University, Yongso-ro 45, Nam-gu, Busan, 48513, Republic of Korea.

<sup>d</sup>Department of Semiconductor Engineering, Division of Nanotechnology and Semiconductor Engineering, Pukyong National University, Yongso-ro 45, Nam-gu, Busan, 48513, Republic of Korea E-mail

† Minho Yoon and Heung-Sik Kim contributed equally to this work.

\*Corresponding Author: E-mail: [minhoyoon78@kangwon.ac.kr](mailto:minhoyoon78@kangwon.ac.kr), [jiyoul\\_lee@pknu.ac.kr](mailto:jiyoul_lee@pknu.ac.kr), [yongyong@pknu.ac.kr](mailto:yongyong@pknu.ac.kr).

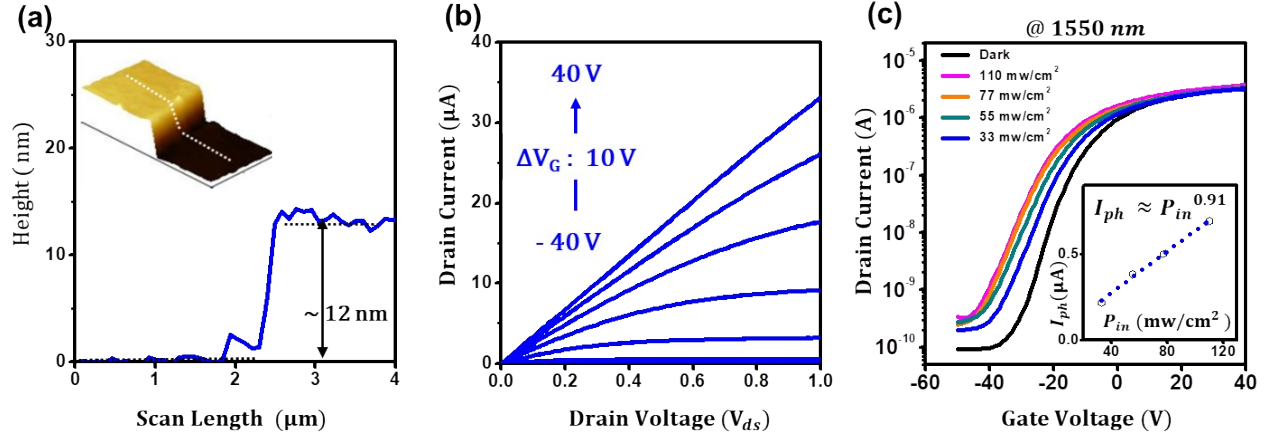

**Fig. S1.** (a) Thickness profiles ( $\sim 12$  nm) of the IGZO-coated MoS<sub>2</sub> FET. (b) The output characteristics ( $I_{ds}$  vs.  $V_{ds}$ ) of the IGZO-coated MoS<sub>2</sub> FET. (c) Photo-response of the IGZO-coated MoS<sub>2</sub> FET as a function of power of the incident light. Inset: fitting curve with a power law.

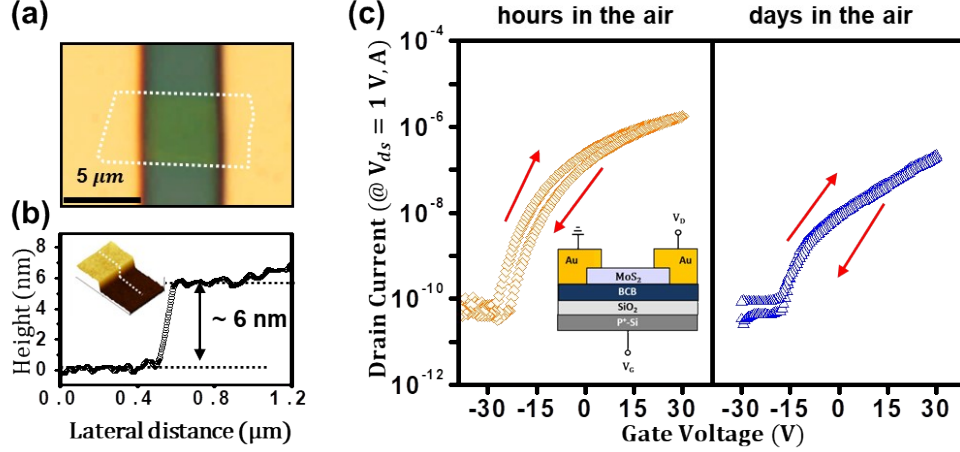

**Fig. S2.** (a, b) Optical microscopy (OM) image, AFM image along with channel thickness profiles ( $\sim 6$  nm). The channel width and length of the MoS<sub>2</sub> FET are 5.1 and 5.8  $\mu\text{m}$ , respectively. (c) Transfer characteristics of n-type MoS<sub>2</sub> FET with 300 nm-thick BCB/SiO<sub>2</sub> dielectric with cross section scheme (inset).

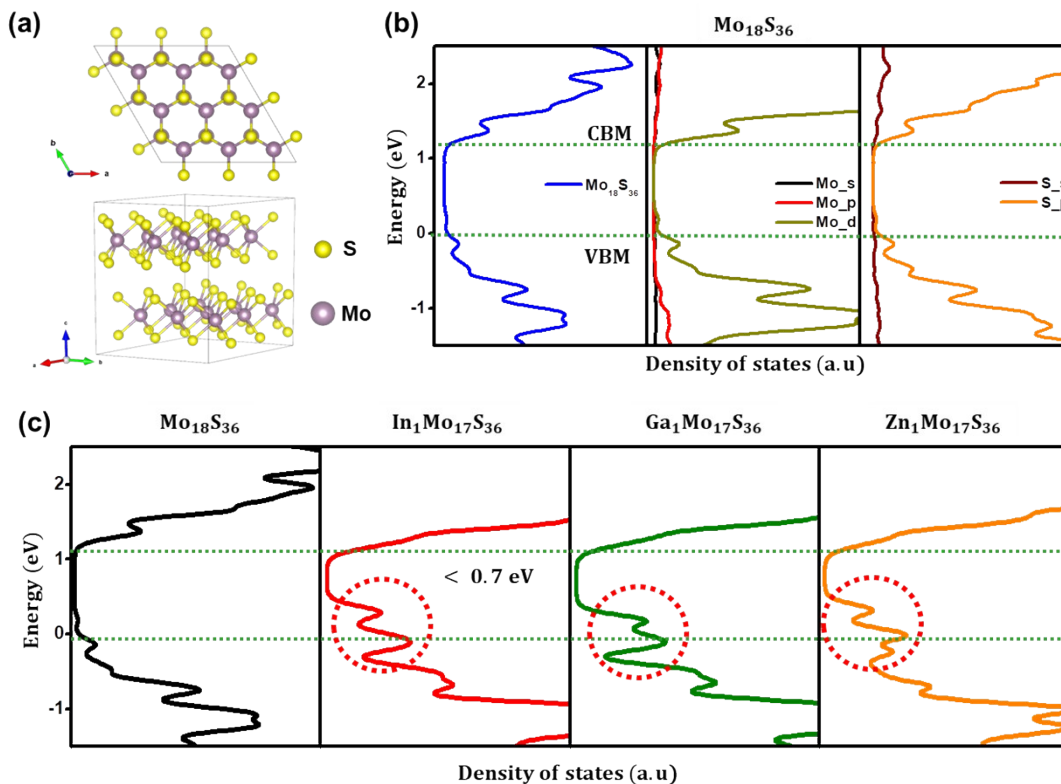

**Fig. S3.** (a) Constructed MoS<sub>2</sub> supercell. (b) Electronic density of states of MoS<sub>2</sub>. (c) Electronic density of states of doped MoS<sub>2</sub> flakes, which contain metal ions such as indium (In), gallium (Ga), and zinc (Zn), respectively.

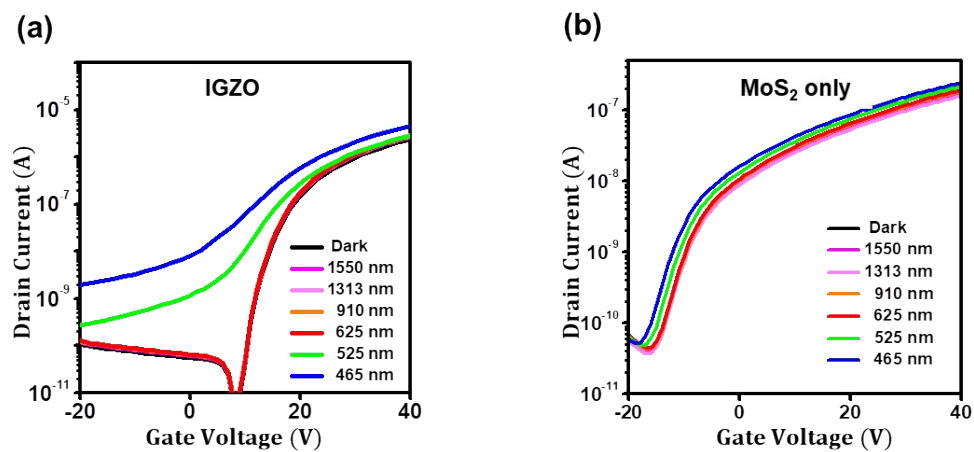

**Fig. S4.** (a, b) Photo-detecting properties of the IGZO and MoS<sub>2</sub> FET, respectively.

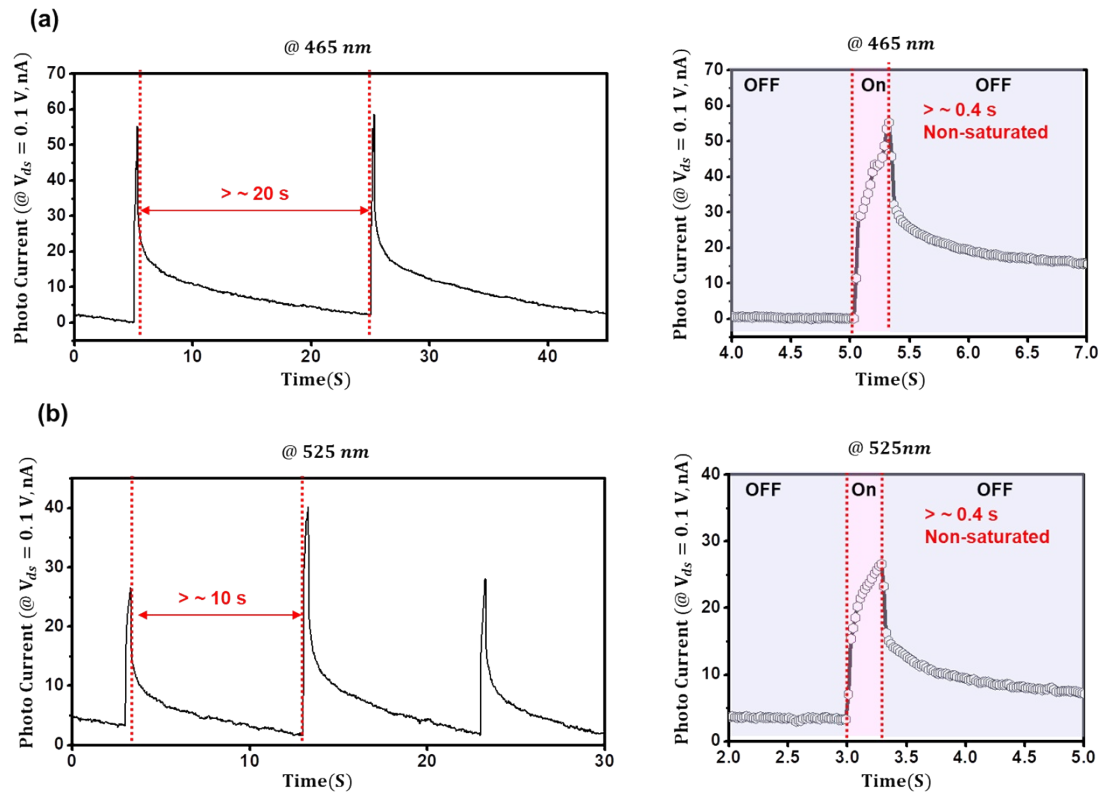

**Fig. S5.** (a, b) Dynamic photoresponse of the IGZO-coated MoS<sub>2</sub> phototransistor to visible lights (465 , 525 nm), respectively.

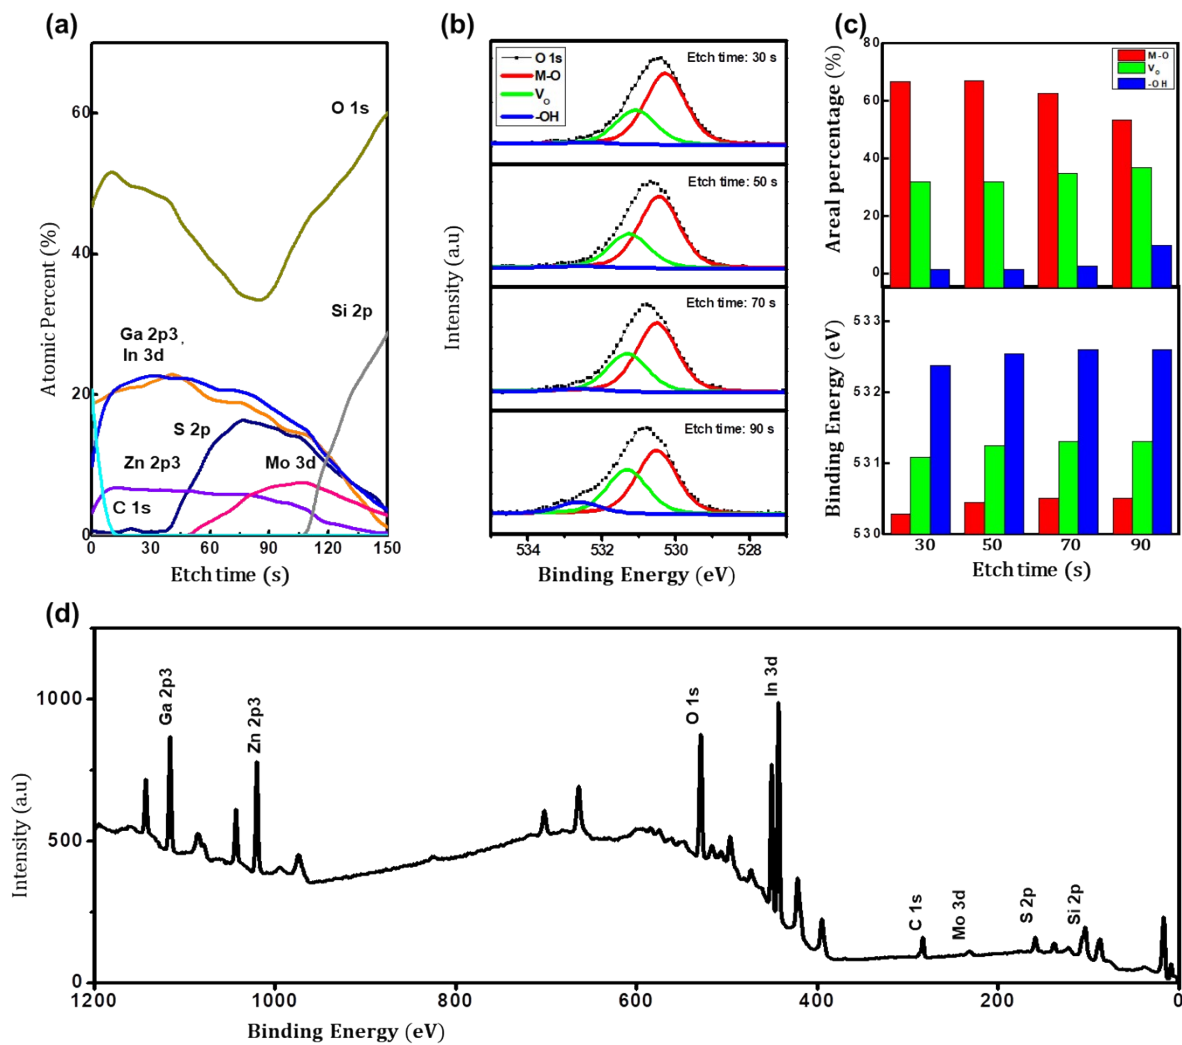

**Fig. S6.** XPS analyses of the IGZO-coated MoS<sub>2</sub>. (a) XPS depth profile (b) O1s spectrum changes as a function of etch time. (c) Areal percentage and binding energy shift of O1s spectra. (d) Survey scan of the surface of the IGZO-coated MoS<sub>2</sub>.

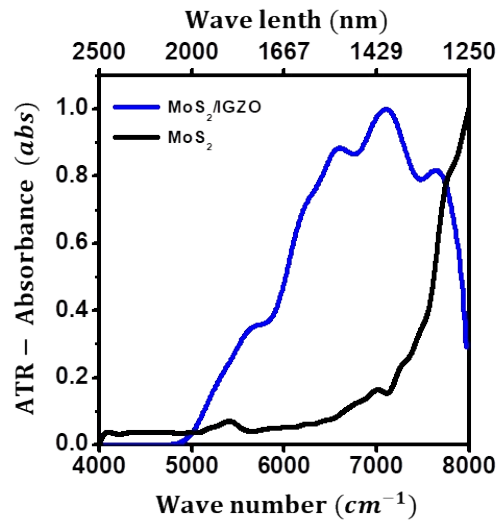

**Fig. S7.** Near-infrared absorption spectra of the MoS<sub>2</sub>-only and MoS<sub>2</sub>/IGZO flakes, respectively.

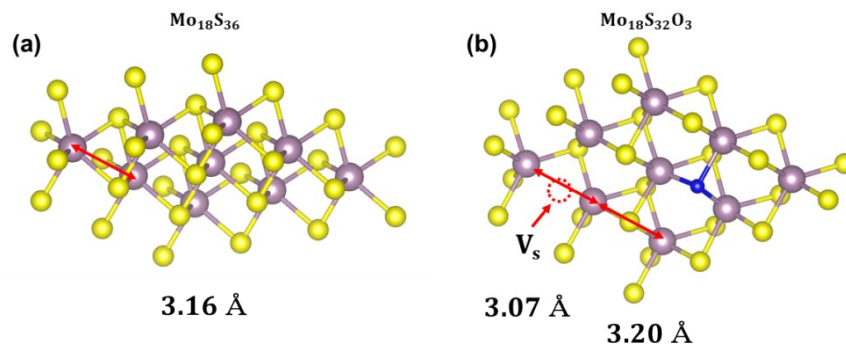

**Fig. S8.** (a, b) Fully relaxed crystal structure of MoS<sub>2</sub> and defective MoS<sub>2</sub>, respectively.

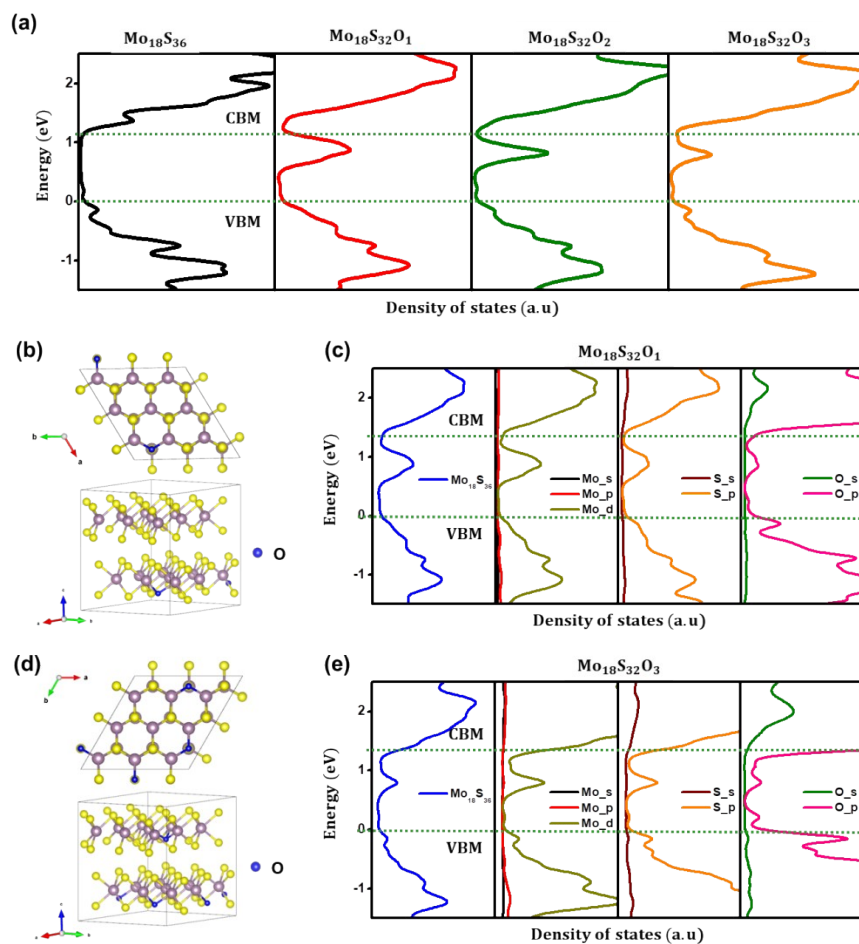

**Fig. S9.** (a) Electronic density of states of the defective MoS<sub>2</sub> according to the stoichiometry. (b, c) Constructed supercell and electronic density of states of defective MoS<sub>2</sub> (Mo<sub>18</sub>S<sub>32</sub>O<sub>1</sub>). (d, e) Constructed supercell and electronic density of states of defective MoS<sub>2</sub> (Mo<sub>18</sub>S<sub>32</sub>O<sub>3</sub>).

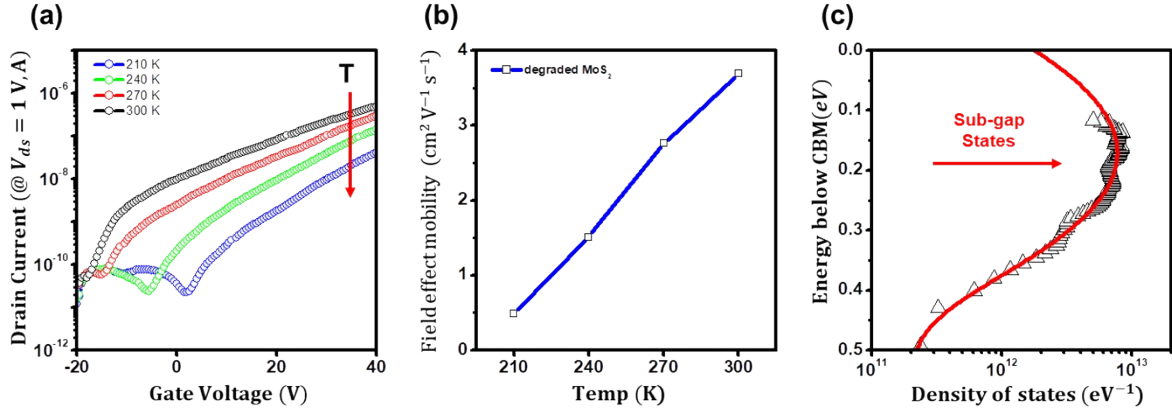

**Fig. S10.** (a, b) Temperature dependence of the transfer curves and field-effect mobility of the degraded  $\text{MoS}_2$  FETs c Extracted charge trap density of states (DOS) of the degraded  $\text{MoS}_2$  FET.
